# Supplementary material for: Parachute-Like Mitral Valve Tuberculoma: A Rare Presentation
Source: Case Rep Cardiol. 2017 Oct 8;2017:1023924. doi: 10.1155/2017/1023924 (PMC5651129; doi:10.1155/2017/1023924)
Supplement: Supplementary file 1 — Moving Image -1: Transthoracic 2-D and 4-D echocardiographic views in para-sternal long axis orientation. Parachute-shaped mass can be observed in LA with its open side towards mitral valve and its attachments to atrial side of AML and inferoposterior region of left atrial endocardium. The hollow mass gets inflated in systole due to mitral regurgitation into its cavity. Moving Image-2: Transthoracic apical 4-chamber view showing the parachute mass in LA with its attachments to AML and LA wall. Color Doppler shows two separate jets of significant MR; one eccentric jet into the true LA cavity along its lateral wall and the other into mass' cavity making it bulge into LA with each systole. Moving Image-3: CMR in sagittal plane reconfirms the thick-walled parachute mass tethered to the tip of AML and LA inferoposterior region. Systolic flow into the mass and significant MR are also evident. [file 1023924.f1.zip]

Archive with 4 entries (3 files):
- Supplementary/
- Supplementary/MOVING IMAGE 1 (3).wmv
- Supplementary/MOVING IMAGE 2 (1).wmv
- Supplementary/MOVING IMAGE 3.wmv
